# Supplementary material
Source: PubMed Central journal article supplement (PMC4048900)

# Supl figure

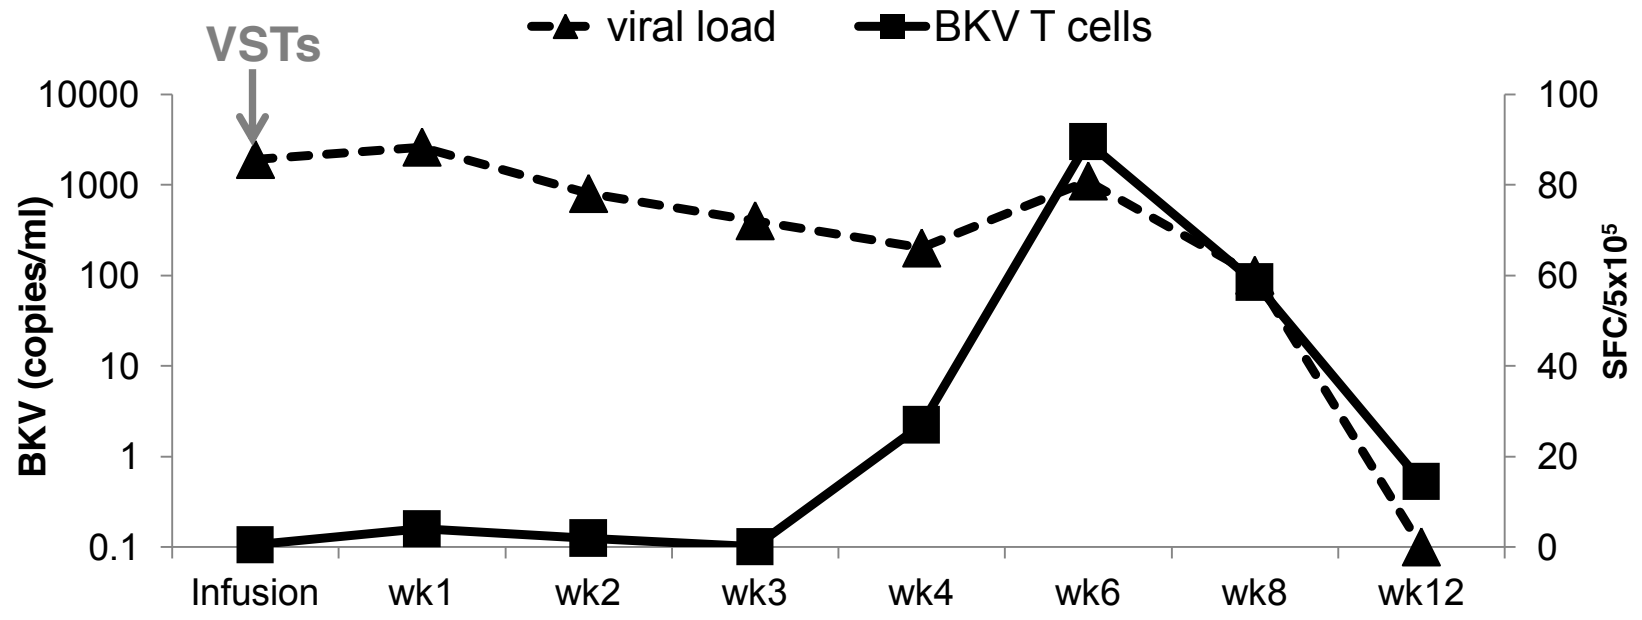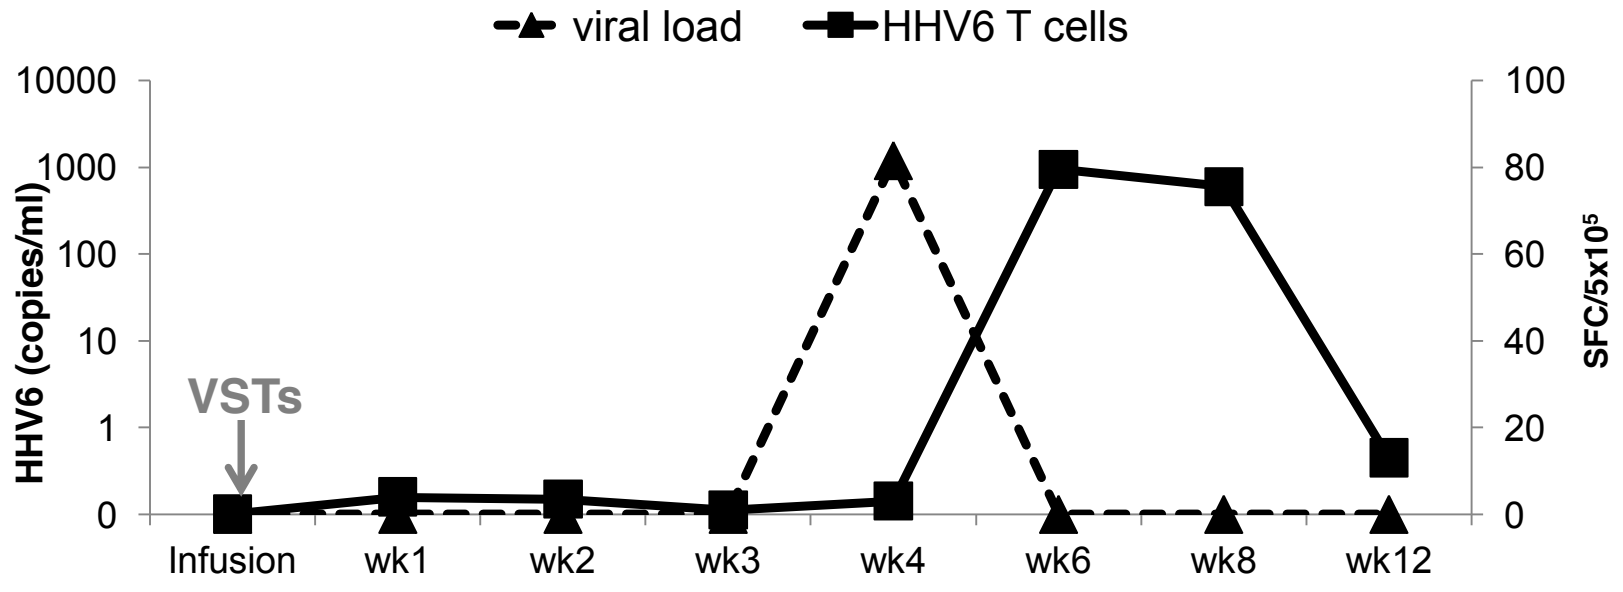

Supplement: mt201448x1.pdf [file mt201448x1.pdf]
